# Supplementary material for: PhenoDigm: analyzing curated annotations to associate animal models with human diseases
Source: Oxford University Press journal article supplement (doi:10.1093/database/bat025), 2013-05-09

# Recall of MorbidMap gene-disease associations

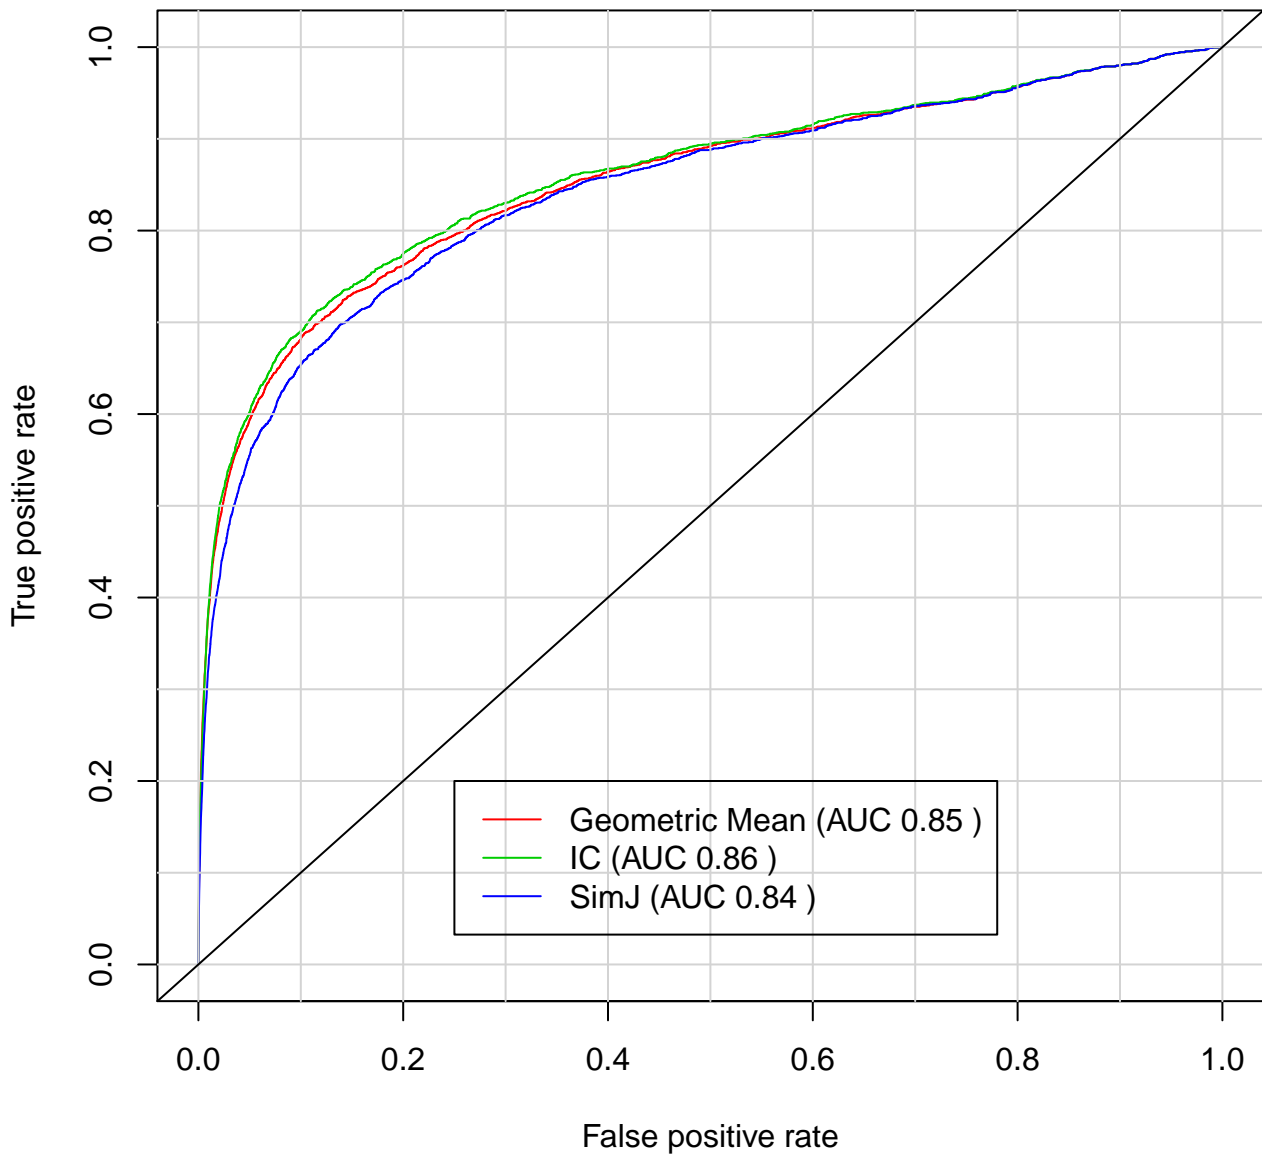

# Recall of MorbidMap gene-disease associations

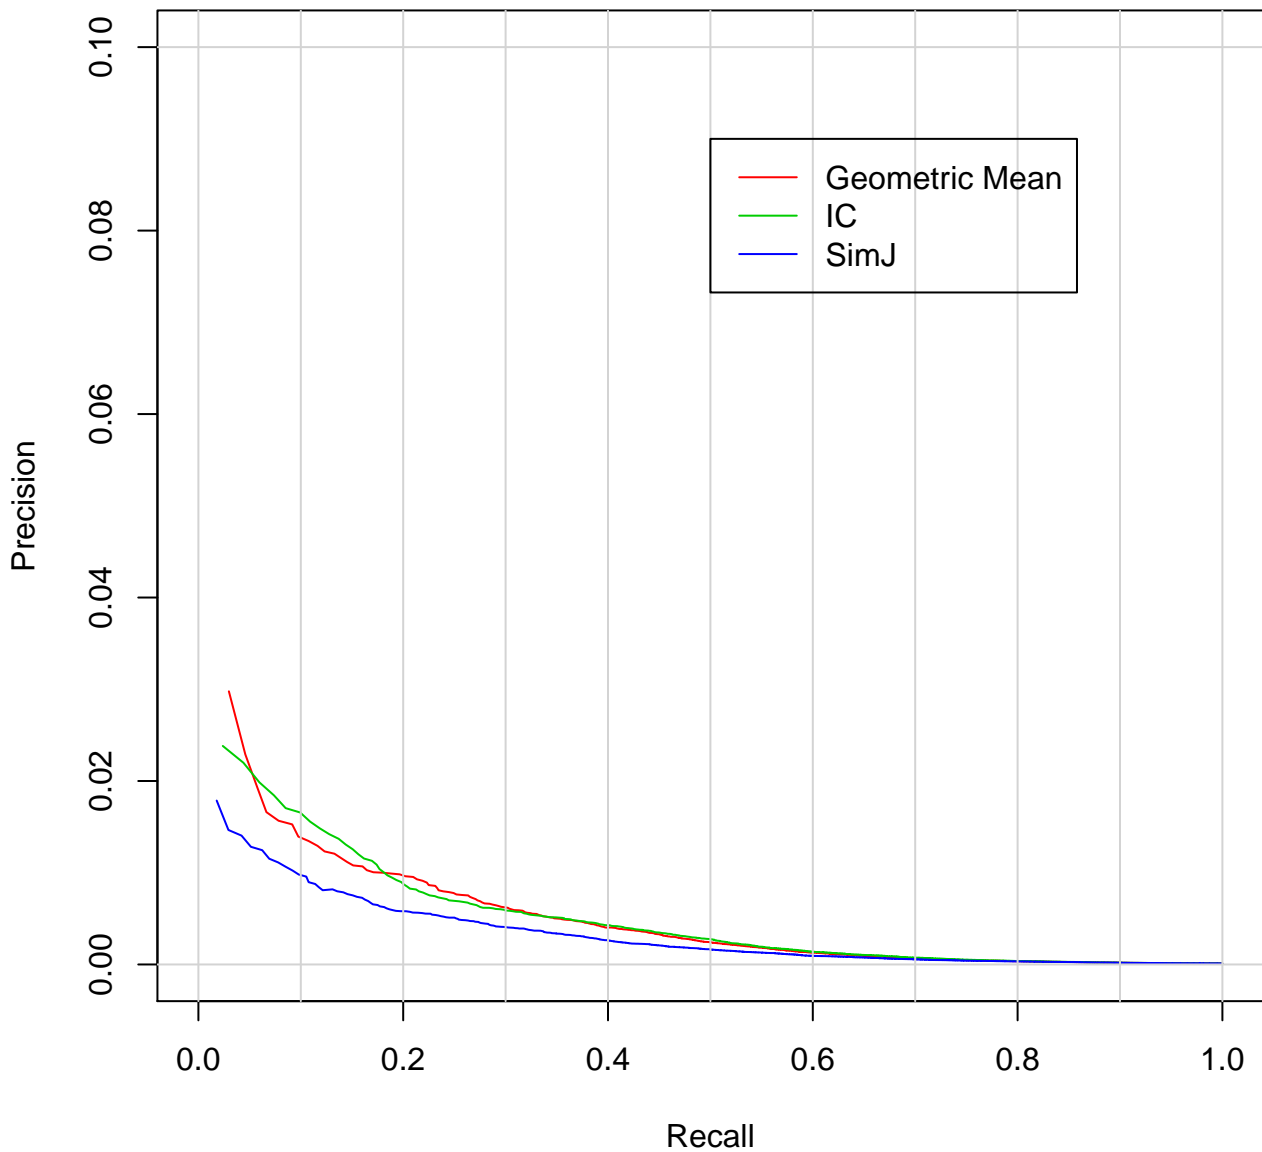

Supplement: bat025_Supplementary_Data.zip [file bat025_Supplementary_Data.zip]
